# Supplementary material for: Novel Re(i) dendrimers: synthesis, characterization and theoretical studies
Source: Royal Society of Chemistry journal article supplement (doi:10.1039/b912939a), 2009-01-01
Supplement: b912939a.pdf [file b912939a.pdf]

## Electronic Supplementary Information

### Novel Re(I) dendrimers: synthesis, characterization and theoretical studies

Zhenjun Si<sup>a,b</sup>, Xiaona Li<sup>a</sup>, Xiyun Li<sup>a</sup>, Guohai Xu<sup>a</sup>, Zhiyong Guo<sup>a</sup>, Hongjie Zhang<sup>\*a</sup>, and Liang Zhou<sup>a</sup>

<sup>a</sup> State Key Laboratory of Rare Earth Resource Utilization, Changchun Institute of Applied Chemistry, Chinese Academy of Sciences, Changchun 130022, People's Republic of China. Fax: +86 43185698041; Tel: 86 431 85262127; E-mail: hongjie@ciac.jl.cn (H.-J. Zhang)

<sup>b</sup> School of Materials Science and Engineering, Changchun University of Science and Technology, Changchun 130022, People's Republic of China. Fax: +86 43185583015; Tel: +86 43185583016; E-mail: sizj168@126.com (Zhenjun Si)

**Table S1.** Selected bond lengths (Å) and angles (deg) for **P1** and **P2**.

|                  | <b>P1</b>    |             | <b>P2</b>    |             |
|------------------|--------------|-------------|--------------|-------------|
|                  | Experimental | Theoretical | Experimental | Theoretical |
| C(1)-Re(1)       | 1.881(7)     | 1.914       | 1.981(8)     | 1.914       |
| C(2)-Re(1)       | 1.909(6)     | 1.925       | 1.921(7)     | 1.925       |
| C(3)-Re(1)       | 1.927(7)     | 1.925       | 1.933(8)     | 1.925       |
| N(1)-Re(1)       | 2.182(4)     | 2.186       | 2.161(5)     | 2.186       |
| N(2)-Re(1)       | 2.175(5)     | 2.186       | 2.177(5)     | 2.186       |
| Br(1)-Re(1)      | 2.6246(7)    | 2.677       | 2.6285(7)    | 2.677       |
| O(1)-C(1)-Re(1)  | 176.9(5)     | 179.7       | 174.4(7)     | 179.8       |
| O(2)-C(2)-Re(1)  | 178.3(6)     | 177.2       | 178.6(6)     | 177.2       |
| O(3)-C(3)-Re(1)  | 177.2(6)     | 177.3       | 175.5(6)     | 177.3       |
| C(13)-N(2)-Re(1) | 126.3(4)     | 125.8       | 126.7(4)     | 125.8       |
| C(12)-N(2)-Re(1) | 114.8(4)     | 115.2       | 115.2(4)     | 115.2       |
| C(5)-N(1)-Re(1)  | 125.7(4)     | 125.4       | 126.6(4)     | 125.4       |
| C(4)-N(1)-Re(1)  | 115.8(4)     | 115.3       | 115.3(4)     | 115.3       |
| C(1)-Re(1)-C(2)  | 89.8(3)      | 92.1        | 88.4(3)      | 92.2        |
| C(1)-Re(1)-C(3)  | 88.9(3)      | 92.2        | 90.4(3)      | 92.1        |
| C(2)-Re(1)-C(3)  | 87.5(3)      | 90.7        | 89.8(3)      | 90.7        |
| C(1)-Re(1)-N(1)  | 94.5(2)      | 93.5        | 90.2(2)      | 93.4        |
| C(2)-Re(1)-N(1)  | 98.5(2)      | 96.6        | 98.6(2)      | 96.5        |
| C(3)-Re(1)-N(1)  | 173.1(2)     | 170.6       | 171.5(2)     | 170.7       |
| C(1)-Re(1)-N(2)  | 95.6(2)      | 93.4        | 96.9(2)      | 93.4        |
| C(2)-Re(1)-N(2)  | 172.3(2)     | 170.7       | 172.2(2)     | 170.6       |
| C(3)-Re(1)-N(2)  | 98.1(2)      | 96.6        | 95.8(2)      | 96.6        |
| N(1)-Re(1)-N(2)  | 75.64(17)    | 75.62       | 75.75(19)    | 75.62       |
| C(1)-Re(1)-Br(1) | 178.5(2)     | 177.0       | 169.94(18)   | 177.02      |
| C(2)-Re(1)-Br(1) | 89.8(2)      | 89.8        | 87.6(2)      | 89.9        |
| C(3)-Re(1)-Br(1) | 92.51(18)    | 90.1        | 98.8(2)      | 90.0        |
| N(1)-Re(1)-Br(1) | 84.15(13)    | 83.93       | 81.28(13)    | 84.19       |
| N(2)-Re(1)-Br(1) | 84.59(12)    | 84.34       | 86.25(13)    | 84.27       |

**Table S2. Frontier molecular orbital compositions (%) in the ground state for P1 and P2 at B3LYP/LANL2DZ level**

| Orbital       | P1     |            |                   |      |      | P2     |           |                   |                  |      |    |        |
|---------------|--------|------------|-------------------|------|------|--------|-----------|-------------------|------------------|------|----|--------|
|               | E (eV) | Bond type  | Contribution (%)  |      |      |        | E (eV)    | Bond type         | Contribution (%) |      |    |        |
|               |        |            | Re                | CO   | Br   | L1     |           |                   | Re               | CO   | Br | L2     |
| LUMO+3        | -1.06  | $\pi^*(L)$ |                   |      |      | 72.3L' | -1.03     | $\pi^*(L)$        |                  |      |    | 93.3L' |
| LUMO+2        | -2.01  | $\pi^*(L)$ |                   |      |      | 22.5R1 | -1.96     | $\pi^*(L)$        |                  |      |    | 97.8L' |
| LUMO+1        | -2.52  | $\pi^*(L)$ |                   |      |      | 93.1L' | -2.49     | $\pi^*(L)$        |                  |      |    | 98.9L' |
| LUMO          | -2.78  | $\pi^*(L)$ |                   |      |      | 97.5L' | -2.76     | $\pi^*(L)$        |                  |      |    | 90.4L' |
| HOMO-LUMO gap | 2.73   |            |                   |      |      | 90.4L' | 2.73      |                   |                  |      |    |        |
| HOMO          | -5.51  | d(Re)      | 11.4 $d_{z^2}$    |      |      |        | d(Re)     | 16.9 $d_{z^2}$    |                  |      |    |        |
|               |        | $\pi(CO)$  | 5.1 $d_{yz}$      | 14.4 | 57.2 |        | $\pi(CO)$ | 1.1 $d_{yz}$      | 14.4             | 57.2 |    |        |
|               |        | $\pi(Br)$  | 3.4 $d_{x^2-y^2}$ |      |      |        | $\pi(Br)$ | 4.4 $d_{x^2-y^2}$ |                  |      |    |        |
| HOMO-1        | -5.55  | d(Re)      | 13.9 $d_{xz}$     | 11.1 | 59.6 |        | d(Re)     | 8.8 $d_{xz}$      | 10.8             | 58.0 |    |        |
|               |        | $\pi(CO)$  | 3.6 $d_{xy}$      |      |      |        | $\pi(CO)$ | 5.5 $d_{xy}$      |                  |      |    |        |
|               |        | $\pi(Br)$  |                   |      |      |        | $\pi(Br)$ |                   |                  |      |    |        |
| HOMO-2        | -5.78  | $\pi(L)$   |                   |      |      | 19.8L' | -5.59     | $\pi(L)$          |                  |      |    | 65.4L' |
|               |        |            |                   |      |      | 79.5   |           |                   |                  |      |    | 30.7R2 |
| HOMO-3        | -6.19  | $\pi(L)$   |                   |      |      | R1     | -6.01     | $\pi(L)$          |                  |      |    | 96.6L' |
|               |        |            |                   |      |      | 99.5R1 |           |                   |                  |      |    |        |

**Table S3. Frontier molecular orbital compositions (%) in the ground state for D1 and D2 at B3LYP/LANL2DZ level**

| Orbital       | D1     |            |                  |      |      |        | D2        |            |                  |      |    |        |
|---------------|--------|------------|------------------|------|------|--------|-----------|------------|------------------|------|----|--------|
|               | E (eV) | Bond type  | Contribution (%) |      |      |        | E (eV)    | Bond type  | Contribution (%) |      |    |        |
|               |        |            | Re               | CO   | Br   | L3     |           |            | Re               | CO   | Br | L4     |
| LUMO+3        | -1.49  | $\pi^*(L)$ |                  |      |      | 97.6R3 | -1.42     | $\pi^*(L)$ |                  |      |    | 97.6R4 |
| LUMO+2        | -2.15  | $\pi^*(L)$ |                  |      |      | 92.5L' | -2.13     | $\pi^*(L)$ |                  |      |    | 92.6L' |
| LUMO+1        | -2.623 | $\pi^*(L)$ |                  |      |      | 96.8L' | -2.61     | $\pi^*(L)$ |                  |      |    | 96.9L' |
| LUMO          | -2.87  | $\pi^*(L)$ |                  |      |      | 90.4L' | -2.85     | $\pi^*(L)$ |                  |      |    | 90.4L' |
| HOMO-LUMO gap | 2.55   |            |                  |      |      |        | 2.38      |            |                  |      |    |        |
| HOMO          | -5.42  | $\pi(L)$   |                  |      |      | 97.2R3 | -5.23     | $\pi(L)$   |                  |      |    | 97.7R4 |
| HOMO-1        | -5.54  | $\pi(L)$   |                  |      |      | 99.8R3 | -5.34     | $\pi(L)$   |                  |      |    | 99.8R4 |
| HOMO-2        | -5.58  | d(Re)      | 13.7             |      |      |        | d(Re)     | 16.2       |                  |      |    |        |
|               |        | $\pi(CO)$  |                  | 14.9 | 55.9 |        | $\pi(CO)$ |            | 14.9             | 55.9 |    |        |
|               |        | $\pi(Br)$  | 4.7              |      |      |        | $\pi(Br)$ | 4.8        |                  |      |    |        |
| HOMO-3        | -5.62  | d(Re)      | 8.9              |      |      |        | d(Re)     | 6.3        |                  |      |    |        |
|               |        | $\pi(CO)$  |                  | 11.5 | 58.6 |        | $\pi(CO)$ |            | 11.5             | 58.6 |    |        |
|               |        | $\pi(Br)$  | 6.6              |      |      |        | $\pi(Br)$ | 11.6       |                  |      |    |        |

**Table S4. Selected triplet-absorption parameters of P1, P2, D1, and D2 in CH<sub>2</sub>Cl<sub>2</sub> according to TDDFT (LANL2DZ) calculations**

| Complex   | State          | Transition | $\lambda(\text{nm}) / E(\text{eV})$ | Assignment |
|-----------|----------------|------------|-------------------------------------|------------|
| <b>P1</b> | T <sub>1</sub> | H→L        | 507/2.44                            | d→π*/π→π*  |
|           | T <sub>2</sub> | H-1→L      | 501/2.47                            | d→π*/π→π*  |
|           | T <sub>3</sub> | H-1→L      | 485/2.56                            | d→π*/π→π*  |
|           | T <sub>4</sub> | H-2→L      | 476/2.60                            | π→π*       |
|           | T <sub>5</sub> | H→L+2      | 430/2.88                            | d→π*/π→π*  |
| <b>P2</b> | T <sub>1</sub> | H→L        | 521/2,38                            | d→π*/π→π*  |
|           | T <sub>2</sub> | H-2→L      | 504/2.46                            | π→π*       |
|           | T <sub>3</sub> | H-2→L      | 489/2.54                            | π→π*       |
|           | T <sub>4</sub> | H-1→L      | 483/2.57                            | d→π*/π→π*  |
|           | T <sub>5</sub> | H→L+2      | 435/2.85                            | d→π*/π→π*  |
| <b>D1</b> | T <sub>1</sub> | H→L        | 517/2.40                            | π→π*       |
|           | T <sub>2</sub> | H-4→L      | 502/2.47                            | π→π*       |
|           | T <sub>3</sub> | H-5→L      | 493/2.51                            | π→π*       |
|           | T <sub>4</sub> | H→L+1      | 480/2.58                            | π→π*       |
|           | T <sub>5</sub> | H-1→L      | 473/2.62                            | π→π*       |
| <b>D2</b> | T <sub>1</sub> | H→L        | 543/2.28                            | π→π*       |
|           | T <sub>2</sub> | H-1→L      | 504/2.46                            | π→π*       |
|           | T <sub>3</sub> | H-5→L      | 503/2.46                            | π→π*       |
|           | T <sub>4</sub> | H-6→L      | 496/2.50                            | π→π*       |
|           | T <sub>5</sub> | H→L+1      | 489/2.54                            | π→π*       |

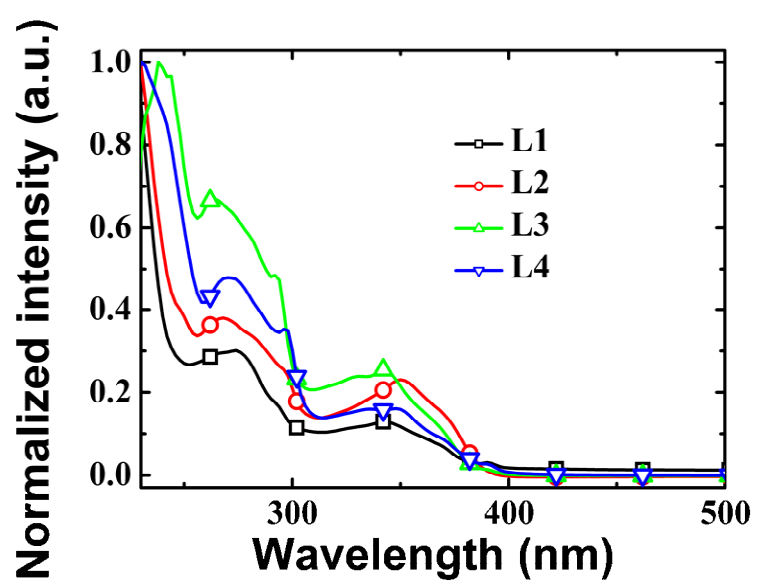

Fig. S1. Absorption spectra of L1 – L4 in CH<sub>2</sub>Cl<sub>2</sub>.

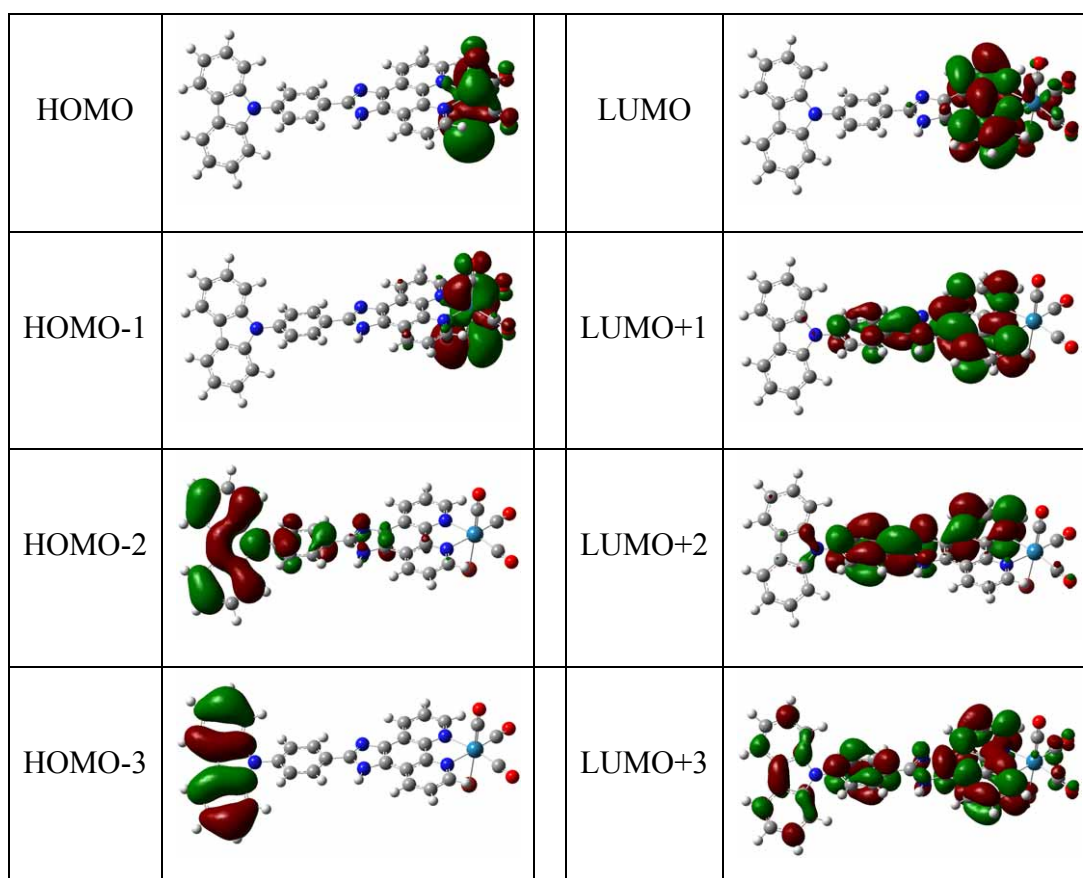

**Fig. S2.** Electron density plots of the frontier orbitals for **P1**.

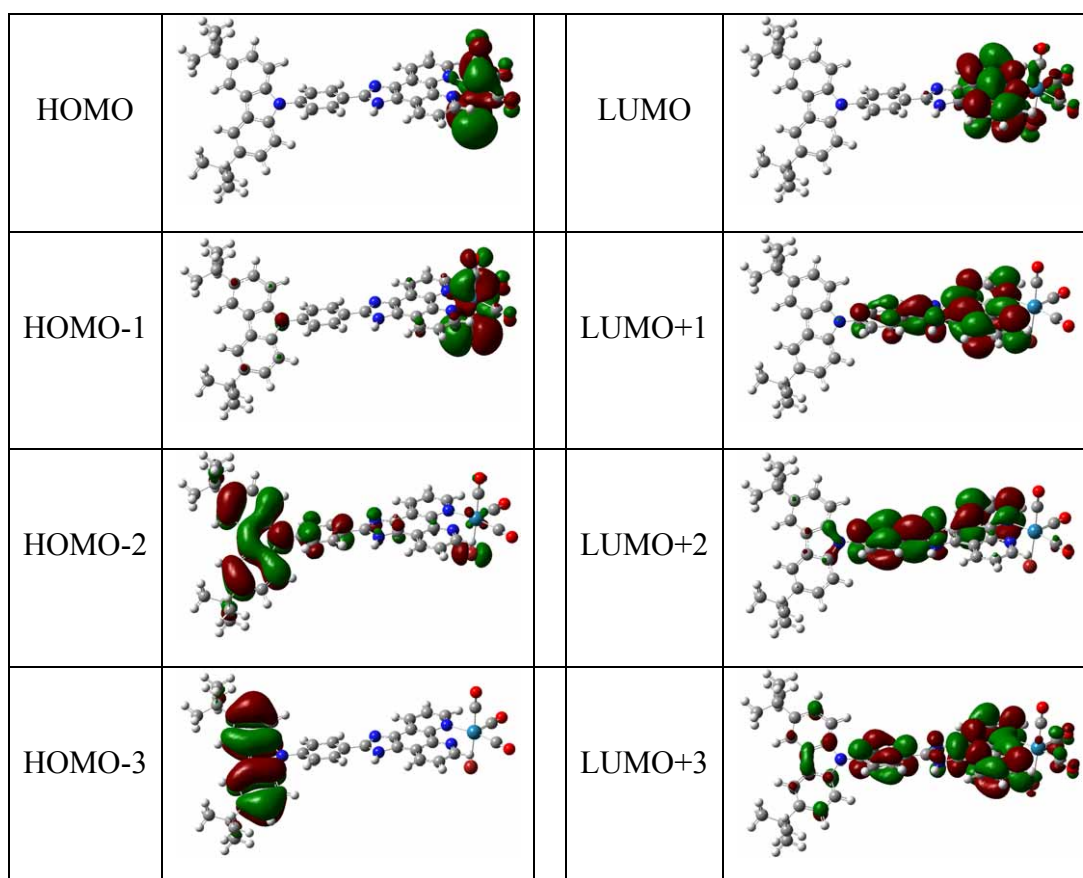

**Fig. S3.** Electron density plots of the frontier orbitals for **P2**.

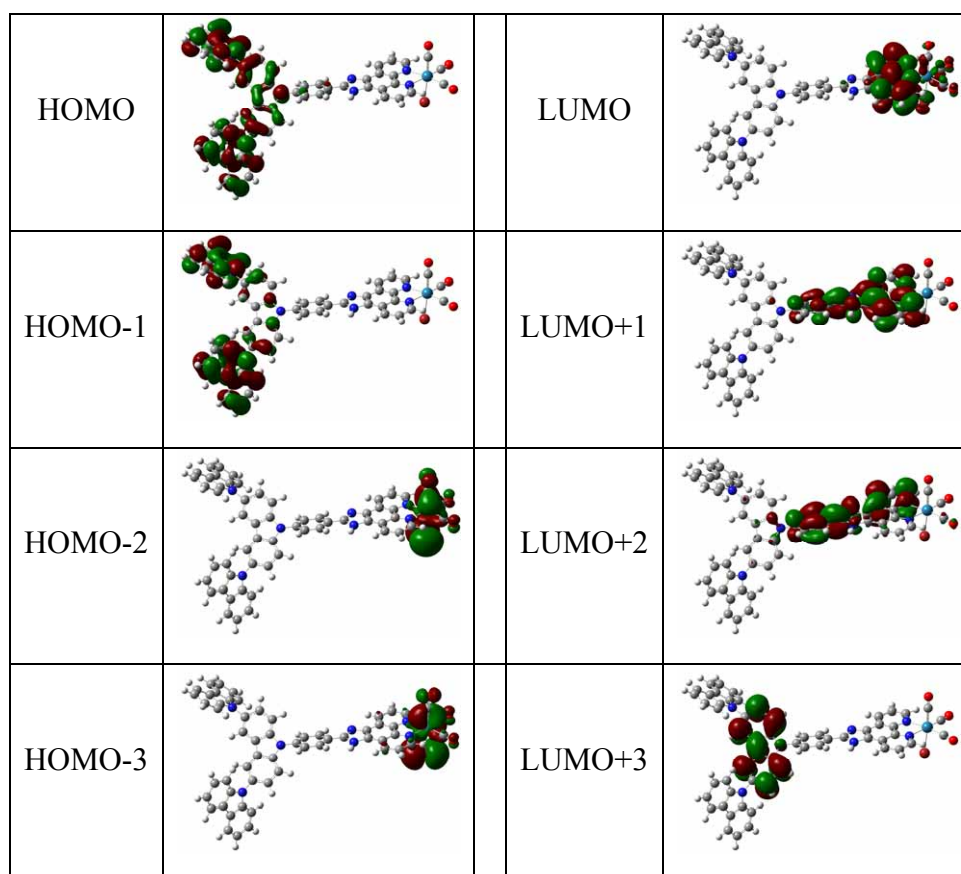

**Fig. S4.** Electron density plots of the frontier orbitals for **D1**.



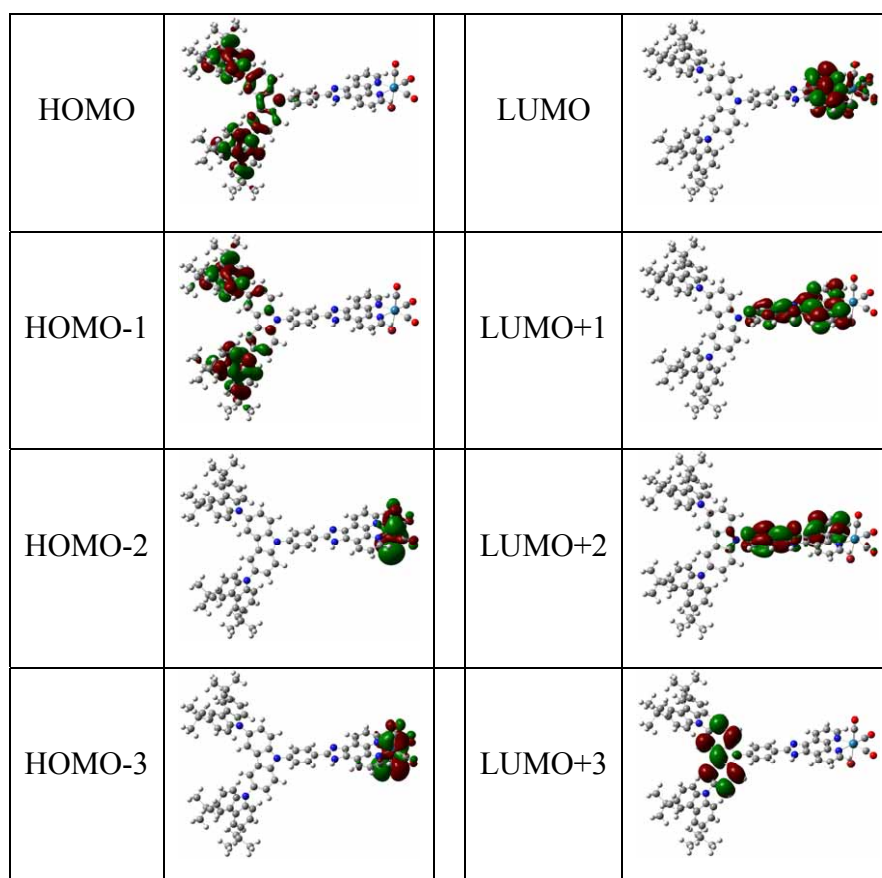

**Fig. S5.** Electron density plots of the frontier orbitals for **D2**.
